# Supplementary material for: Hospital Characteristics Associated with Observed Transcatheter Aortic Valve Replacement Prices
Source: bioRxiv or medRxiv preprint supplement (doi:10.1101/2024.05.20.24307421), 2024-05-20
Supplement: Supplementary file [file media-1.pdf]

## S1 Appendix. Model Specification

The first part of the model involved creating a binomial model predicting the odds of TAVR price-disclosure as follows:

$$\begin{aligned} &TAVR\ Price\ Disclosure_i \\ &= \beta_0 + \beta_1 USNWR\ TAVR\ Quality\ Score_i + \beta_2 Hospital\ Profit\ Margin_i \\ &+ \beta_3 Markup_i + \beta_4 Bed\ Days\ Available_i + \beta_5 TAVR\ Rate\ IQR_i \\ &+ \beta_6 Government\ Apporpriations_i + \beta_7 Total\ Capital\ (Fixtures)_i + \varepsilon_i \\ & i = individual\ hospital \end{aligned}$$

Then, using the results from the first part of the model, we extracted a probability of TAVR price disclosure,  $\hat{p}$ . Then for the second part of our model, we used a Log-Linked Gamma Model to model the median TAVR price only within the hospitals that disclosed prices:

$$\begin{aligned} &Median\ TAVR\ Price_i \\ &= \beta_0 + \beta_1 USNWR\ TAVR\ Quality\ Score_i + \beta_2 Hospital\ Profit\ Margin_i \\ &+ \beta_3 Markup_i + \beta_4 Bed\ Days\ Available_i + \beta_5 TAVR\ Rate\ IQR_i \\ &+ \beta_6 Government\ Apporpriations_i + \beta_7 Total\ Capital\ (Fixtures)_i + \varepsilon_i \\ & i = individual\ hospital \end{aligned}$$

Following that, we calculated each hospital's expected TAVR price:

$$\begin{aligned} &Predicted\ TAVR\ Price_i = \hat{p}_i \times Median\ TAVR\ Price_i \\ & i = individual\ hospital \end{aligned}$$

Finally, the observed to expected TAVR price ratio was calculated:

$$\begin{aligned} &Observed\ to\ Expected\ TAVR\ Price\ Ratio_i = \frac{Actual\ TAVR\ Price_i}{Predicted\ TAVR\ Price_i} \\ & i = individual\ hospital \end{aligned}$$
